# Supplementary material
Source: PubMed Central journal article supplement (PMC6042216)
Supplement: NIHMS979500-supplement-Supplemental_Appendix.pdf [file NIHMS979500-supplement-Supplemental_Appendix.pdf]

**Incorporating Health into Studies of Political Behavior:  
Evidence for Turnout and Partisanship**

*Julianna Pacheco and Jason Fletcher*

Supplemental Appendix

Table A1 Descriptive Information for all Variables used in the Analyses

|                                            | Mean     | Standard<br>Deviation | Min | Max    |
|--------------------------------------------|----------|-----------------------|-----|--------|
| <i>Variables in GSS</i>                    |          |                       |     |        |
| Voted in Most Recent Presidential Election | .63      | .48                   | 0   | 1      |
| Republican Party Identification            | .27      | .44                   | 0   | 1      |
| SRHS                                       | 2.05     | .82                   | 0   | 3      |
| Age                                        | 45.66    | 17.42                 | 18  | 89     |
| High School Degree                         | .54      | .50                   | 0   | 1      |
| Some College                               | .05      | .23                   | 0   | 1      |
| College Degree or Higher                   | .18      | .38                   | 0   | 1      |
| Female                                     | .52      | .49                   | 0   | 1      |
| Black                                      | .13      | .33                   | 0   | 1      |
| Other                                      | .06      | .24                   | 0   | 1      |
| Married                                    | .63      | .48                   | 0   | 1      |
| Strong Partisan                            | .26      | .44                   | 0   | 1      |
| Religious Attendance                       | 3.92     | 2.69                  | 0   | 8      |
| Newspaper Readership                       | 2.97     | 1.28                  | 0   | 4      |
| <i>Variables in Add-Health</i>             |          |                       |     |        |
| Voted in 2000 Election (W3)                | .43      | .50                   | 0   | 1      |
| Republican Party Identification (W3)       | .14      | .34                   | 0   | 1      |
| SRHS (W1)                                  | 3.88     | .90                   | 1   | 5      |
| SRHS (W3)                                  | 4.00     | .86                   | 1   | 5      |
| Religious Attendance (W3)                  | 1.99     | 1.92                  | 0   | 6      |
| High School Grad (W3)                      | .32      | .47                   | 0   | 1      |
| College Grad (W3)                          | .55      | .50                   | 0   | 1      |
| Mom High School Grad                       | .35      | .48                   | 0   | 1      |
| Mom College Grad                           | .52      | .50                   | 0   | 1      |
| Employment (W3)                            | .75      | .43                   | 0   | 1      |
| Income (W3)                                | 14017.13 | 14667.71              | 0   | 500909 |
| Age (W3)                                   | 21.83    | 1.84                  | 18  | 28     |
| Female                                     | .49      | .50                   | 0   | 1      |
| Hispanic                                   | .11      | .32                   | 0   | 1      |
| Black                                      | .14      | .35                   | 0   | 1      |
| Other Race                                 | .05      | .21                   | 0   | 1      |
| Family Income (W1)                         | 46.18    | 37.67                 | 0   | 990    |
| Missing Family Information                 | .28      | .45                   | 0   | 1      |

**Table A2 Logistic Regression Model Predicting Voter Turnout and Republican Party Identification with Fuller Set of Controls using the GSS (N=15,537)**

|                          | <b>Voter Turnout</b> | <b>Partisanship</b>     |
|--------------------------|----------------------|-------------------------|
| SRHS                     | .15 ***<br>(.04)     | .21 ***<br>(.04)        |
| Age (centerd at 46)      | .05 ***<br>(.002)    | .00 **<br>(.002)        |
| Age^2                    | -.001 ***<br>(.0001) | .000 ***<br>(.0001)     |
| High School Degree       | .93 ***<br>(.09)     | .15 *<br>(.09)          |
| Some College             | 1.15 ***<br>(.21)    | .30 **<br>(.13)         |
| College Degree or Higher | 1.80 ***<br>(.11)    | .26 ***<br>(.10)        |
| Black                    | -.24 **<br>(.11)     | -1.96 ***<br>(.14)      |
| Other                    | -.39 **<br>(.15)     | -.67 ***<br>(.18)       |
| Female                   | .04<br>(.06)         | -.14 ***<br>(.05)       |
| US Born                  | 1.63 ***<br>(.12)    | .35 ***<br>(.12)        |
| Mother's Education       | .15 ***<br>(.04)     | .18 ***<br>(.03)        |
| City Size                | -.000002<br>(.00002) | -.00001 ***<br>(.00004) |
| Strong Partisan          | .92 ***<br>(.10)     |                         |
| Newspaper Readership     | .16 ***<br>(.24)     | .00<br>(.02)            |
| Married                  | .22 ***<br>(.06)     | .15 ***<br>(.06)        |
| Religious Attendance     | .12 ***<br>(.01)     | .10 ***<br>(.01)        |
| Constant                 | -2.54 ***<br>(.32)   | -3.13 ***<br>(.28)      |
| Year Dummies Included?   | Yes                  | Yes                     |
| Region Dummies Included? | Yes                  | Yes                     |

Note: Standard Errors in parentheses. Significance levels: \*\*\* p<0.01, \*\* p<0.05, \* p<0.1 with a two-tailed test. Age is mean centered. Weights are employed to account for the complex survey design.

**Table A3 Logistic Regression Models with Alternative Dependent Variables**

| Predicting Identification with the Democratic Party using the GSS (N=38,286) |                   |                          | Predicting Having a Party Identification using the Add-Health (N=12,540) |                    |                          |
|------------------------------------------------------------------------------|-------------------|--------------------------|--------------------------------------------------------------------------|--------------------|--------------------------|
|                                                                              |                   | Δ probability min to max |                                                                          |                    | Δ probability min to max |
| SRHS (high values=poor health)                                               | .07 ***<br>(.02)  | 5%                       | SRHS (W1)                                                                | .07 **<br>(.03)    | 6%                       |
|                                                                              |                   |                          | SRHS (W3)                                                                | .07 **<br>(.03)    | 6%                       |
| Age (centerd at 46)                                                          | .01 ***<br>(.001) | 22%                      | Age (W3)                                                                 | .04 ***<br>(.01)   | 9%                       |
| High School Degree                                                           | -.16 ***<br>(.04) | 4%                       | High School Grad (W3)                                                    | .50 ***<br>(.07)   | 11%                      |
| Some College                                                                 | -.25 ***<br>(.08) | 6%                       |                                                                          |                    |                          |
| College Degree or Higher                                                     | -.16 ***<br>(.05) | 4%                       | College Grad (W3)                                                        | 1.11 ***<br>(.07)  | 23%                      |
| Black                                                                        | 1.61 **<br>(.05)  | 38%                      | Black                                                                    | .53 ***<br>(.12)   | 12%                      |
| Other                                                                        | .52 ***<br>(.08)  | 13%                      | Other                                                                    | -.62 ***<br>(.17)  | -12%                     |
| Female                                                                       | .25 ***<br>(.03)  | 6%                       | Female                                                                   | -.02<br>(.05)      |                          |
|                                                                              |                   |                          | Hispanic                                                                 | -.27 *<br>(.16)    | -6%                      |
|                                                                              |                   |                          | Employment (W3)                                                          | -.10<br>(.07)      |                          |
|                                                                              |                   |                          | Income (W3)                                                              | -.01<br>(.02)      |                          |
|                                                                              |                   |                          | Family Income (W1)                                                       | .001<br>(.001)     |                          |
|                                                                              |                   |                          | Mom High School Grad                                                     | -.041<br>(.11)     |                          |
|                                                                              |                   |                          | Mom College Grad                                                         | .19<br>(.13)       |                          |
| Married                                                                      | -.08 **<br>(.03)  | 2%                       |                                                                          |                    |                          |
| Religious Attendance                                                         | -.01 **<br>(.01)  | 15%                      | Religious Attendance (W3)                                                | .12 ***<br>(.02)   | 17%                      |
| Year                                                                         | -.05 ***<br>(.01) | 27%                      |                                                                          |                    |                          |
| Year-squared                                                                 | .001<br>(.0004)   | -19%                     |                                                                          |                    |                          |
|                                                                              |                   |                          | Missing Family Information                                               | -.14 *<br>(.08)    | -3%                      |
| Constant                                                                     | -.07<br>(.07)     |                          | Constant                                                                 | -3.24 ***<br>(.28) |                          |

Note: Standard Errors in parentheses. Significance levels: \*\*\* p<0.01, \*\* p<0.05, \* p<0.1 with a two-tailed test. Age is mean centered. Weights are employed to account for the complex survey design. Robust standard errors are reported for analyses using Add-Health. .
